# Supplementary material for: Development of a prediction model for lower limb deep vein thrombosis in critically ill patients after intracranial hemorrhage at high altitude: a retrospective study
Source: PeerJ. 2025 Nov 13;13:e20245. doi: 10.7717/peerj.20245 (PMC12619939; doi:10.7717/peerj.20245)
Supplement: Supplemental Information 2 [file peerj-13-20245-s002.xlsx]

## Sheet: Sheet2
LDVT（Yes：1；No: 0)	Gender (Male:1; Female:0)	Age (Years)	Aborigines of high altitude areas (≥4500m)(Yes:1;No:0)	Peasant (Yes: 1;No:0)	Herdsman(Yes:1 ;No:0)	Tibetan (Yes :0;No:0)	Apache II score (Scores)	GCS score (Scores)	Polytrauma (Yes:1;No:0)	Lower limb surgery(Yes:0;No:0)	Hypoalbuminemia(Yes:0; No:0)	Hypertension(Yes:0; No:0)	Diabetes(Yes:0; No:0)	Smoker(Yes:0; No:0)	Drinker(Yes:0; No:0)	WBC(*10^9/L)	PLT(*10^9/L)	HGB(g/L)	PT(seconds)	APTT(seconds)	FIB(g/L)	D-dimer(mg/L)	Mannitol(Yes:0; No:0)	Tranexamic acid(Yes:0; No:0)	Glucocorticoids(Yes:0; No:0)	Vasoactive agent(Yes:0; No:0)	Red blood cell transfusion(Yes:0; No:0)	Plasma transfusion(Yes:0; No:0)	Platelet infusion(Yes:0; No:0)	Hemocoagulase(Yes:0; No:0)	Prothrombin complex infusion(Yes:0; No:0)	Human fibrinogen infusion(Yes:0; No:0)	LOS of ICU (days)	Duration of hospital stay (days)	ICU mortality (Yes:0; No:0)
1	0	72	1	0	1	1	18	9	0	0	0	1	0	0	0								1	0	0	0	0	0	0	1	0	0	3	13	0
1	1	28	1	0	1	1	17	15	0	0	1	0	0	0	0	11.8	134	138	15.2	45.8	5.88	11.24	1	0	1	1	0	0	0	1	0	0	12	29	0
1	1	6	0	0	0	1	17	8	1	0	1	0	0	1	1	12.7	165	71	15.2	31.1	3.44	17.88	1	1	1	1	1	0	0	1	0	0	32	61	0
1	0	14	0	0	0	1	7	15	0	0	1	0	0	0	0	5.2	78	189	19	33.3	4.77	10.67	1	0	0	1	0	0	0	1	0	0	13	40	0
1	1	47	0	1	0	1	8	14	0	0	1	1	0	0	0	6.6	48	171	18.6	40	3.79	13.6	1	1	0	1	0	0	0	1	0	0	19	50	0
1	1	68	0	0	1	1	24	10	0	0	1	1	0	0	0	7.4	73	157	15.4	30.3	4.24	16.52	1	0	0	1	0	0	0	0	0	0	14	58	0
1	1	46	0	1	0	1	15	12	0	0	1	1	0	1	0								1	0	1	1	0	1	0	0	0	0	3	9	0
1	1	63	0	1	0	1	5	15	0	0	1	0	0	0	0	9.2	204	98	14.8	31.5	5.69	17.68	1	1	0	0	0	0	0	1	0	0	15	24	0
1	1	66	0	0	0	1	12	3	1	0	1	0	0	1	1	10.2	70	160	14.8	34.1	2.92	17.94	1	0	1	0	0	1	0	1	0	0	15	118	0
1	0	25	0	0	0	1	25	3	0	0	1	0	0	0	1	10.5	109	187	16	43.9	4.85	11.24	1	1	1	1	0	1	0	1	0	0	38	38	1
1	1	76	0	0	0	1	14	4	0	0	1	1	0	1	1	8.5	73	157	15.4	34.8	3.55	17.88	1	0	1	0	0	1	0	1	0	0	73	118	0
1	1	64	0	1	0	1	19	4	0	0	0	1	0	0	1	11.9	87	130	13.8	34.5	3.48	14.67	1	0	0	1	0	0	0	1	0	1	24	90	0
1	1	56	0	1	0	1	25	7	0	0	1	0	0	0	0	11	36	147	15.6	36.9	2.93	16.6	1	1	0	1	0	0	0	1	0	0	20	35	0
1	0	0	0	0	1	1	10	9	0	0	1	0	0	0	0	6.7	76	160	18.5	44.5	4.21	19.52	1	1	0	1	0	0	0	1	0	0	11	77	0
1	1	60	0	1	0	1	8	14	0	0	1	1	0	1	1	15.4	282	93	14	36	6.09	15.64	1	1	1	1	0	1	0	1	0	0	17	41	0
1	1	55	0	1	0	1	12	9	0	0	1	1	0	0	0	7.2	26	231	16.3	48.8	3.41	19.68	1	0	0	0	0	1	0	1	0	0	15	16	0
1	0	49	0	1	0	1	19	6	0	0	1	0	0	0	0	15.7	262	130	19.1	39.6	5.48	16.34	1		1	0	0	0	0	0	0	0	6	14	0
1	1	49	0	0	1	1	15	15	0	0	1	0	0	1	0	4.6	40	101	16.6	46.3	2.26	58.01	1	0	0	1	0	1	1	0	0	0	13	44	0
1	0	39	0	1	0	1	18	15	0	0	1	0	0	0	0	8.1	146	140	14.2	26.7	2.2	62	1	1	0	1	0	0	0	1	0	0	18	31	0
1	1	50	0	1	0	1	16	15	0	0	1	0	0	0	0	15.3	106	117	15.5	41.4	4.25	29.95	1	1	0	1	0	0	0	1	0	0	35	60	0
1	1	71	0	0	0	1	8	15	0	0	0	0	0	0	0	13.9	336	113	15.4	39.4	6.54	2.9	1	1	0	1	0	0	0	1	0	1	15	41	0
1	0	69	0	0	0	1	17	15	1	0	1	0	0	0	0	19.7	177	117	14	34	8.09	2.51	1	0	0	1	0	0	0	0	0	1	10	10	0
1	0	50	0	1	0	1	4	3	1	0	1	0	0	0	0								1	0	1	0	1	1	0	0	0	0	2	23	0
1	0	59	0	1	0	1	14	4	1	0	1	0	0	0	0								1	0	1	0	1	0	0	1	0	1	5	5	1
1	0	45	0	0	0	0	17	3	1	0	1	0	0	0	0	9.6	471	77	14.8	34.9	5.16	5.98	1	0	0	1	0	0	0	1	0	0	14	28	0
1	1	45	0	1	0	1	15	3	1	0	1	0	0	0	1	20	118	175	13	34.9	6.19	16.91	1	0	0	1	1	0	0	1	0	1	32	91	0
1	1	64	0	1	0	1	25	3	1	0	1	1	0	0	0	9.6	122	73	16.5	32.4	3.2	3.31	1	0	0	1	0	0	0	0	0	0	30	148	0
1	1	54	0	0	0	1	5	3	1	0	1	0	0	1	1								1	0	0	1	0	0	0	0	0	0	2	2	0
1	1	68	0	1	0	1	16	3	1	0	1	0	0	0	0	10	252	91	13.2	38.1	4.35	18.16	1	0	0	1	1	1	1	0	0	1	10	19	0
1	0	55	0	0	0	1	13	11	0	0	1	1	0	0	0	10.8	38	197	13.3	50.8	3.91	45.13	1	0	1	1	0	0	1	0	0	0	12	18	0
1	0	64	0	1	0	1	17	3	0	0	1	1	0	0	0								1	0	0	0	0	1	0	1	0	0	17	100	0
1	0	46	0	0	0	1	18	5	0	0	1	1	0	0	0	19.8	51	137	18.5	64.8	8.32	14.27	1	0	0	1	0	0	0	0	0	0	8	8	0
1	0	66	0	0	0	1	16	8	0	0	1	1	0	0	0	10.6	247	122	12.1	38.5	5.97	2.13	1	1	1	0	0	0	0	1	0	0	13	157	0
1	0	56	0	1	0	1	20	15	0	0	0	0	0	0	1	8.8	282	178	14	44.4	9	6.06	1	0	0	1	0	0	0	0	0	0	14	14	0
1	0	64	0	0	0	1	14	8	0	0	1	1	0	0	0	11.5	135	111	12.9	30	4.66	3.7	1	0	1	1	1	0	0	1	0	0	24	118	0
1	0	43	0	1	0	1	8	15	0	0	1	0	0	0	0	11.2	67	117	14.2	38.3	6.9	4.2	1	0	1	0	0	0	0	0	0	0	12	12	0
1	0	64	0	0	0	1	8	15	0	0	1	0	0	0	0								1	0	0	0	0	0	0	1	0	0	4	4	1
1	0	59	0	1	0	1	7	14	0	0	1	1	0	0	0								1	0	1	0	0	0	0	1	0	0	4	5	0
1	0	60	0	1	0	1	22	5	0	0	1	1	0	1	0								1	0	0	1	0	0	0	0	0	0	2	10	0
1	0	47	0	1	0	1	20	5	0	0	1	0	0	0	0								1	0	1	0	0	0	0	1	0	0	1	40	0
1	0	55	0	1	0	1	10	12	0	0	1	1	0	0	0	39.2	23	97	17.7	55.4	2.87	6.71	1	0	0	0	1	0	0	0	0	0	3	7	0
1	0	79	0	0	0	1	20	4	0	0	1	1	0	0	0	4.9	49	109	10.9	31.1	5.84	3.43	1	0	0	1	0	0	1	0	0	0	28	69	0
1	0	81	0	0	0	1	18	5	0	0	1	0	0	0	0	4.7	75	105	12.7	56.6	5.63	3.62	1	1	0	0	1	1	0	1	0	0	23	23	0
1	0	9	0	0	0	1	15	15	0	0	1	0	1	0	1	10.2	129	126	13.1	33.9	2.42	3.82	1	1	1	0	0	0	0	0	0	0	19	28	0
1	0	58	0	1	0	1	24	6	0	0	1	0	0	0	0	15.9	208	140	12	33.6	4.15	8.73	1	0	1	1	1	0	0	0	0	0	13	28	0
1	0	56	0	1	0	1	16	15	0	0	1	0	0	0	0	5.8	207	81	12.4	35.1	1.97	3.71	1	0	1	0	0	0	0	0	0	0	6	29	0
1	0	59	0	0	0	0	14	14	0	0	1	0	0	0	0	9.1	140	110	13.2	49.5	8.28	3.83	1	1	0	0	0	1	0	1	0	0	14	24	0
1	0	39	0	1	0	1	24	7	0	0	1	0	0	0	0	11	130	133	12.6	48.1	2.68	14.21	1	1	0	0	0	0	0	1	0	0	32	55	0
1	1	58	0	1	0	1	19	8	0	0	1	1	0	1	1	15.4	203	125	13.3	44.2	6.52	7.26	1	0	0	0	0	1	0	0	0	0	10	21	0
1	1	66	0	0	0	1	19	11	0	0	1	1	0	1	1	16.9	149	178	14	27.2	3.43	17.17	1	0	0	1	0	0	0	1	0	0	15	40	0
1	1	66	0	1	0	1	15	6	0	0	1	0	0	0	0	7.6	220	122	13.3	42.2	10.33	10.49	1	0	0	1	0	0	0	1	0	0	24	33	0
1	1	58	0	1	0	1	11	3	0	0	1	1	0	0	0	10.7	120	151	12.8	36.4	5.13	16.15	1	0	1	0	0	0	0	0	0	0	26	168	0
1	1	31	0	0	0	1	17	8	0	0	1	0	0	1	1	10.9	278	115	10.2	30.5	7.18	8.16	1	0	0	0	0	0	0	0	0	0	11	11	0
1	1	81	0	0	0	1	17	9	0	0	1	0	0	0	0	12.4	291	176	11.5	37.6	7.12	7.01	1	0	0	0	0	1	0	0	0	0	35	50	0
1	1	49	0	0	0	1	20	5	0	0	0	0	0	0	1	11.1	235	131	11	27.3	8.26	3.45	1	0	0	0	1	0	0	0	0	0	11	19	0
1	1	51	0	0	0	1	22	3	0	0	1	1	0	1	1	7.5	119	97	12.4	34.9	6.49	2.24	1	0	1	0	0	0	0	1	0	0	25	89	0
1	1	54	0	1	0	1	27	3	0	0	1	1	0	1	0	10.7	201	115	11	24	4.78	7.06	1	0	0	0	1	0	0	1	0	0	22	40	0
1	1	50	0	0	0	1	7	15	0	0	1	0	0	0	0	17	251	95	13.1	40.7	4.96	8.17	1	0	0	0	1	0	0	0	0	0	11	48	0
1	1	58	0	1	0	1	18	8	0	0	1	1	0	0	0	5.8	96	246	14.7	48.6	3.07	5.42	1	0	0	0	0	1	0	1	0	0	6	8	0
1	1	77	0	1	0	1	16	15	0	0	1	0	0	1	1	11	113	215	14.8	53.2	4.92	13.38	1	0	0	0	0	0	0	1	0	0	8	28	0
1	1	19	0	0	0	1	20	14	0	0	1	0	0	0	0								1	0	0	0	0	0	0	0	0	0	6	6	0
1	1	58	0	1	0	1	8	15	0	0	1	1	0	0	0								1	0	0	0	0	0	0	1	0	0	1	2	0
1	1	40	0	1	0	1	14	6	0	0	1	1	0	0	1	15.7	557	98	13	40.2	6.26	3.84	1	0	0	0	0	0	0	0	0	0	14	50	0
1	1	89	0	1	0	1	10	8	0	0	1	1	0	1	1	6.4	139	123	13.7	37.1	5.35	8.24	1	0	0	0	0	0	0	0	1	0	21	56	0
1	1	40	0	1	0	1	14	6	0	0	1	1	0	1	0								1	1	0	0	0	0	0	1	0	0	2	2	0
1	1	75	0	0	0	1	15	15	0	0	1	0	0	0	0								1	0	0	0	0	0	0	0	0	0	5	5	0
1	1	50	0	1	0	1	14	15	0	0	1	0	0	0	0	9.1	13	117	14	40.9	2.16	60	1	1	1	0	0	0	0	0	0	0	16	22	1
1	1	64	0	1	0	1	14	15	0	0	1	1	0	0	0	12	185	93	13.4	35.5	4.62	2.81	1	0	0	0	0	0	0	0	0	0	13	34	0
1	1	77	0	0	0	1	8	15	0	0	1	0	0	0	0	10	149	124	13.8	32.4	6.9	3.26	1	0	0	0	0	0	0	0	0	0	10	36	0
1	1	57	0	0	1	1	19	6	0	0	1	1	0	0	0	9.4	213	98	12.8	37.2	6.32	4.86	1	1	0	0	0	0	0	1	0	1	30	30	1
1	0	51	0	1	0	1	10	15	0	0	1	1	0	0	0	13.6	251	199	13	37.9	6.39	7.34	1	1	0	0	0	0	0	1	0	1	22	91	0
1	0	45	0	1	0	1	6	5	0	0	1	0	0	0	0	11	92	125	13.4	35.6	3.46	15.89	1	0	0	0	1	0	0	1	0	0	25	33	0
1	0	61	0	1	0	1	16	15	0	0	1	1	0	0	0	11.7	199	126	12.7	35.5	6.36		1	0	1	0	0	0	0	1	0	0	8	21	0
1	0	53	0	1	0	1	15	6	0	0	1	0	0	0	0	9.1	218	86	10.5	29.9	5.85	6.93	1	1	0	0	1	0	0	1	0	0	16	35	0
1	1	47	0	0	0	0	17	7	1	0	1	0	0	1	1	10.6	142	114	14.9	41.7	6.01		1	1	0	0	0	0	0	1	0	0	18	72	0
1	1	51	0	0	0	0	19	10	0	0	1	1	0	0	0	4.2	292	149	13	35.4	6.43	8.75	1	1	0	0	0	0	0	1	0	0	20	39	0
1	1	52	0	0	0	0	16	14	0	0	1	1	0	0	0	10.3	193	155	14.4	35.5	6.52	14.15	1	1	0	1	0	0	0	1	0	0	27	35	0
1	1	44	0	0	0	0	12	15	0	0	1	1	0	1	1	9.2	127	200	14	39.6	5.77	3.79	1	1	0	0	0	0	0	1	0	0	24	28	0
1	1	69	0	0	0	0	14	14	0	0	0	1	0	1	1	9.8	435	115	14	38.5	7.89	8.27	1	0	0	1	0	0	0	0	0	0	12	26	0
1	1	60	0	0	0	0	24	3	0	0	1	0	0	0	0	7	65	114	18.4	54.5	11.89	7.94	1	1	0	1	0	1	0	0	1	0	11	12	1
1	1	58	0	0	0	0	18	15	0	0	1	1	0	1	1	9.8	182	95	11.8	31.5	7.39	0.63	1	1	0	1	0	0	0	1	0	0	22	118	0
1	0	40	0	0	0	0	9	14	0	0	1	0	0	1	1	7.6	78	240	13.8	42.4	5.52	10.67	1	0	0	1	0	1	0	1	0	0	28	45	0
1	1	54	0	0	0	0	14	6	0	0	1	1	0	1	1	9.5	163	98	13.3	50.4	3.45	60	1	1	0	1	0	1	0	0	1	1	18	55	0
1	1	67	0	0	0	0	14	12	0	0	1	1	0	0	0	15.1	377	117	14.8	39.1	8.79	8.21	1	0	1	1	1	0	0	0	0	0	26	89	0
1	1	70	0	0	0	0	22	5	0	0	1	0	0	0	1	9.3	219	114	12.3	50.9	6.79	4.93	1	1	0	0	0	0	0	1	0	0	13	60	0
1	1	37	0	0	0	0	24	6	0	0	1	1	0	1	1	5.1	257	97	13.1	31.6	4.52	6.46	1	1	0	1	0	0	0	1	0	0	16	75	0
0	0	44	1	0	1	1	13	11	0	0	0	0	0	0	0	11.2	213	108	15.1	36.6	5.47	12.59	1	0	0	0	0	0	0	1	0	0	20	35	0
0	0	71	1	1	0	1	21	5	0	0	1	1	1	0	0	9.4	99	114	17.4	39.7	7.99	24.15	1	0	0	1	0	1	0	1	0	0	13	13	0
0	0	33	1	1	0	1	18	15	0	0	1	0	0	0	0	10.1	326	95	11.3	38.7	6.79	4.94	1	0	0	1	0	0	0	0	0	0	20	69	0
0	0	70	1	0	1	1	21	8	0	0	1	1	0	0	0	9.8	218	147	11.3	36	4.53	1.61	1	0	0	0	0	0	0	1	0	0	14	28	0
0	0	35	1	0	1	1	19	9	0	0	0	0	0	0	0	5.3	173	135	12.8	38	6.44	2.53	1	0	0	0	0	0	0	1	0	0	18	34	0
0	0	35	1	0	1	1	13	9	0	0	1	0	0	0	0								1	1	1	0	0	0	0	1	0	0	1	22	0
0	1	60	1	0	1	1	25	9	0	0	1	1	0	0	0	14.7	120	90	16	51.6	3.71	2.06	1	0	0	1	0	0	0	0	1	1	12	17	0
0	1	48	1	0	1	1	12	15	0	0	0	1	0	0	0	13.1	179	138	17.4	36.6	5.92	1.55	1	0	0	0	0	0	0	1	0	0	14	23	0
0	1	50	1	0	0	1	13	13	0	0	0	1	0	1	1	12.6	216	90	11.9	32.4	5.39	2.19	1	0	1	0	0	0	0	1	0	0	7	27	0
0	1	51	1	1	0	1	20	15	0	0	1	1	0	1	1								1	1	0	0	0	0	0	0	0	0	1	18	0
0	1	33	1	0	1	1	12	7	1	0	1	0	0	0	0	8.1	148	137	15	50.9	3.26	1.56	1	0	0	1	0	0	0	0	0	0	8	61	0
0	0	36	1	0	1	1	8	15	0	0	1	0	0	0	0								1	1	0	1	0	0	0	0	0	0	16	48	0
0	0	39	1	0	1	1	8	10	0	0	0	0	0	1	0	6.2	174	103	12.7	65.8	5.57	2.25	1	0	0	1	0	0	0	0	0	0	11	19	0
0	0	35	1	0	1	1	16	15	0	0	0	0	0	0	0	11.2	214	198	12.4	37.6	8.8	2.95	1	1	0	1	0	0	0	0	0	0	8	29	0
0	1	63	1	0	1	1	12	5	0	0	0	1	0	0	0	15.7	306	139	14	29.9	7.86	1.16	1	1	0	0	0	0	0	0	0	1	13	14	0
0	1	60	1	0	1	1	15	15	0	0	1	1	0	0	0	20	381	75	11.6	34.9	5.42	7.5	1	0	0	1	1	0	0	0	0	0	8	9	0
0	1	28	1	0	0	1	19	3	1	0	0	0	0	0	0	16.4	415	132	14	40.3	8.21	4	1	1	0	1	0	0	0	1	0	0	8	13	0
0	1	36	1	0	1	1	16	7	1	0	1	0	0	0	0	7.6	127	103	11.8	38.5	5.68	1.11	1	1	0	1	0	0	0	1	0	0	7	25	0
0	1	36	1	0	1	1	14	10	1	0	0	0	0	1	1	9.7	396	155	13.6	35.8	7.08	3.48	1	1	0	0	0	0	0	1	0	0	9	18	0
0	0	4	1	0	0	1	25	3	1	0	1	0	0	0	0	15.7	224	110	15.4	42.1	6.75	3.98	1	0	1	1	1	0	0	1	0	0	24	130	0
0	1	42	1	0	0	1	22	3	1	0	0	0	0	0	1	9.9	254	96	18.4	33.2	6.14	2.59	1	1	0	0	0	0	0	1	0	1	7	12	0
0	0	66	1	0	1	1	12	15	0	1	1	0	0	0	0								1	1	0	1	0	1	0	0	0	0	3	6	0
0	0	55	1	0	1	1	15	10	0	1	1	1	1	0	0	12.7	274	113	16.9	38.2	6.08	1.67	1	1	0	1	0	0	0	1	0	0	16	51	0
0	0	57	1	0	1	1	18	3	0	0	0	0	0	0	0	6.7	123	118	14.6	28.8	4.42	4.26	1	1	1	1	1	0	0	1	0	0	19	25	0
0	0	60	1	0	1	1	15	12	0	0	0	1	0	0	0	9.4	199	121	14.8	37.1	2.66	1.73	1	0	0	0	0	0	0	1	0	0	2	28	0
0	0	31	1	0	1	1	4	15	0	0	1	0	0	0	0	12.2	343	138	14.3	31.3	8.91	2.68	1	1	1	1	0	0	0	1	0	0	7	12	0
0	0	35	1	0	1	1	8	15	0	0	0	0	0	0	0								1	0		1	0	0	0	1	0	0	4	23	0
0	0	66	1	0	1	1	16	8	0	0	1	1	0	0	0	9.1	249	106	14.8	40	7.25	2.92	1	1	0	0	0	0	0	1	0	0	14	58	0
0	0	68	1	0	1	1	25	3	0	0	0	1	0	0	0	8.9	358	132	14.8	36.4	6.89	2.03	1	1	0	0	0	0	0	1	0	0	7	101	0
0	0		1	0	1	1	21	5	0	0	1	0	0	0	0	15.8	223	97	14	37.1	5.67	2.79	1	1	0	1	0	0	0	1	0	0	11	12	0
0	0	61	1	0	1	0	9	15	0	0	1	1	0	0	0	4.6	151	121	15.7	38.1	3.23	60	1	1	0	0	0	0	0	1	0	0	9	9	0
0	0	60	1	0	1	1	20	4	0	0	1	1	0	0	0	12.6	357	124	14.5	37.3	4.07	1.76	1	0	0	0	0	0	0	1	0	1	22	156	0
0	0	66	1	0	1	1	9	14	0	0	0	1	0	0	0	8.5	244	165	14.3	30.7	3.43	10.69	1	0	0	0	0	0	0	1	0	0	3	17	0
0	1	41	1	0	1	1	11	7	0	0	1	0	0	0	1	38.7	195	150					1	1	0	1	0	0	0	1	0	0	11	13	0
0	1	67	1	0	1	1	6	14	0	0	1	1	0	0	0	11.4	257	104	12.3	29.8	6.34	2.29	1	0	1	1	1	1	0	1	0	0	26	33	0
0	1	61	1	0	1	1	17	9	0	0	1	1	0	0	0								1	0	0	0	0	0	0	1	0	0	2	16	0
0	1	52	1	0	1	1	17	11	0	0	1	1	0	1	1	9.4	84	203	16.6	39.4	5.18	5.4	1	0	1	1	0	0	1	1	0	1	35	35	0
0	1	56	1	0	1	1	16	6	0	0	0	1	0	0	0	9.6	372	99	12.8	33.2	6.37	15.41	1	0	0	0	0	0	0	1	0	0	6	18	0
0	1	42	1	0	1	1	17	9	0	0	0	0	0	0	0								1	0	0	0	0	0	0	0	0	0	1	34	0
0	1	49	1	0	1	1	14	9	0	0	1	0	0	1	0								1	0	0	0	0	0	0	1	0	0	1	27	0
0	1	77	1	0	1	1	15	14	0	0	0	1	0	0	0	7.9	142	169	15	37.6	8.09	11.47	1	1	0	1	0	0	0	1	0	0	12	60	0
0	1	78	1	0	1	1	19	13	0	0	0	1	0	0	0								1	0	1	0	1	0	0	1	0	0	2	22	0
0	1	75	1	0	1	1	18	6	0	0	0	1	0	0	0								1	0	0	0	0	0	0	1	0	0	1	7	0
0	1	49	1	0	1	1	8	15	0	0	0	1	0	0	0								1	0		0	0	0	0	1	0	0	1	18	0
0	1	74	1	0	1	1	16	9	0	0	1	1	0	0	0	1.9	78	118	15.6	33.8	3.92	12.56	1	1	0	1	0	0	0	1	0	0	21	21	0
0	1	67	1	0	1	1	22	8	0	0	0	0	0	0	0	0							1				0	0	0		0		1	22	0
0	1	61	1	0	1	1	19	6	0	0	1	1	0	0	0	0							1	1	0	1	0	0	0	1	0	0	2	12	0
0	1	60	1	0	1	1	17	5	0	0	1	1	0	0	0	16.7	607	150	14.1	37.1	6.54	1.28	1	0	0	0	0	0	0	1	0	0	20	47	0
0	1	68	1	0	1	1	19	5	0	0	1	1	0	0	0	8.5	160	142	15.8	39.9	8.22	15.28	1	0	1	1	0	0	0	1	0	1	14	34	0
0	1	61	1	0	1	1	15	8	0	0	1	1	0	0	0	24.3	263	153	16.1	39.6	10.53		1	0	1	0	0	0	0	1	0	0	46	50	0
0	1	36	1	0	1	1	19	15	0	0	1	0	0	0	0	15.3	485	80	13.1	30.1	6.81	2.17	1	1	1	1	1	0	0	1	0	0	14	64	0
0	1	39	1	0	1	1	14	8	0	0	1	0	0	1	0	15.3	485	80	13.1	30.1	6.81	2.17	1	1	1	0	1	0	0	1	0	0	14	64	0
0	0	46	1	0	0	1	16	14	0	0	1	0	0	0	0	22	283	134	14.8	39.1	7.94	3.39	1	0	0	1	0	0	0	1	0	0	21	44	0
0	0	59	1	1	0	1	22	6	0	0	0	1	0	0	1	9.2	44	189	18.3	44.9	3.03	52.26	1	1	0	1	0	0	0	0	0	0	3	14	0
0	0	60	1	1	0	1	7	15	0	0	0	1	0	0	0	15.7	224	110	15.4	42.1	6.75	3.98	1	0	1	1	1	0	0	1	0	0	24	130	0
0	0	53	1	1	0	1	16	8	0	0	0	0	0	0	0								1	0	1	0	0	0	0	1	0	0	1	33	0
0	0	48	1	1	0	1	5	5	0	0	1	0	0	0	0	5.3	54	180	15.4	41.1	4.32	14.65	1	0	0	1	0	0	0	1	0	0	9	9	0
0	0	38	1	1	0	1	5	14	0	0	1	0	0	0	0	12.7	247	126	16	34.4	5.6	11.37	1	1	0	1	0	0	0	1	0	0	8	8	0
0	1	40	1	1	0	1	8	15	0	0	1	0	0	1	1								1	1	0	1	0	0	0	1	0	0	1	1	0
0	1	33	1	0	0	1	20	3	0	0	1	0	0	1	0	15.5	189	176	16.4	50.3	6.77	4.9	1	0	0	1	0	1	0	0	0	1	16	16	0
0	1	30	1	1	0	1	7	15	0	0	1	0	0	1	0	8.1	151	102	12.3	35.6	2.99	4.23	1	1	0	1	0	0	0	1	0	1	4	10	0
0	1	32	1	1	0	1	21	15	0	0	1	0	0	0	0	13.1	233	97	13.4	44.5	10.61	3.27	1	1	0	1	1	0	0	1	0	0	22	110	0
0	1	60	1	0	0	1	16	10	0	1	1	1	0	0	0	9	199	84	11.5	45	7.11	3.26	1	1	0	1	0	0	0	1	0	0	18	53	0
0	1	59	1	0	0	1	26	3	0	0	1	1	0	0	0								1	0	0	1	0	0	0	1	0	0	3	26	0
0	1	59	1	0	0	1	24	3	0	0	0	1	0	1	1	12.2	223	163	14.1	39	6.77	1.27	1	0	0	1	0	0	0	0	0	0	21	42	0
0	1	26	1	0	0	1	10	12	0	0	0	0	0	0	0								1	0	0	1	0	0	0	1	0	0	2	2	0
0	1	46	1	0	0	1	22	6	0	0	1	0	0	0	0	13.1	148	163	15.2	37.5	6.72	6.15	1	1	0	1	0	0	0	1	0	0	14	36	0
0	1	41	1	0	0	1	8	7	0	0	1	1	0	1	1	17.9	308	162	16.5	46.1	10.09	2.75	1	0	1	1	0	0	0	1	0	0	8	23	0
0	1	8	1	1	0	1	18	3	0	0	1	0	0	1	1	9.3	109	90	15.3	32.3	4.88	3.19	1	1	0	0	1	0	0	1	0	0	17	53	0
0	1	55	1	1	0	1	18	7	0	0	0	1	0	0	0								1	1	0	0	0	0	0	1	0	0	2	4	0
0	1	44	1	1	0	1	7	15	0	0	0	1	0	0	0								1	0	0	0	0	0	0	1	0	0	1	16	0
0	1	57	1	1	0	1	19	12	0		0	1	0	1	0	0							1	1	1	1	0	0	0	1	0	0	1	22	0
0	1	35	1	1	0	1	16	15	0	0	1	0	0	0	0	0							1	1	1	1	0	0	0	1	0	0	1	73	0
0	1	50	1	1	0	1	12		0	0	0	0	0	0	0	17.1	205	110	16.2	41.6	5.41	2.25	1	0	0	1	1	0	0	1	0	0	18	18	0
0	1	56	1	1	0	1	5	15	0	0	1	0	0	0	0								1	1	0	0	0	0	0	1	0	0	2	12	0
0	1	53	1	1	0	1	17	15	0	0	1	1	0	1	1	24.1	398	145	14.3	33.6	4.95	1.69	1	0	0	0	0	0	0	0	0	1	2	156	0
0	1	48	1	0	0	1	17	7	0	0	0	1	0	0	0	13.1	246	166	15.3	28.9	7.79	2.84	1	0	0	1	0	0	0	0	0	0	9	11	0
0	1	31	1	0	1	1	19	15	0	0	0	0	0	1	1	11.1	281	138	13.9	38.7	6.36	2.06	1	0	0	0	0	0	0	0	0	0	8	8	0
0	0	50	0	1	0	1		15	0	0	0	1	0	0	0								1	0	0	1	0	1	0	0	0	1	5	39	0
0	1	38	0	0	1	1	24	3	1	0	1	0	0	0	0								1	0	0	1	1	0	0	1	0	0	4	18	0
0	0	59	0	0	1	1	21	14	0	1	1	1	0	1	0	31.4	278	109	12.8	42.5	7.37	2.57	1	0	0	0	0	0	0	0	0	0	13	34	0
0	0	41	0	0	1	1	16	5	0	0	1	0	0	0	0								1	1	0	1	0	0	0	0	0	0	6	10	0
0	1	35	0	0	1	1	14	9	0	0	0	0	0	1	1	9.6	121	211	14	39	4	8.93	1	0	0	1	0	0	0	0	0	0	16	16	0
0	1	57	0	0	1	1	14	5	0	0	0	0	0	0	0	9.7	154	100	13.1	43.6	7.61	15.99	1	1	0	1	0	0	0	1	0	0	14	50	0
0	1	49	0	0	1	1	12	15	0	0	1	0	0	0	0								1	0	1	1	0	1	0	0	0	0	2	25	0
0	1	73	0	0	1	1	24	5	0	0	0	1	0	0	0	14.2	145	174	13.1	32.8	5.14	60	1	1	0	1	0	0	0	1	0	0	17	53	0
0	0	35	0	1	0	1	8	14	0	0	1	0	0	0	0	10.4	478	87	15.3	34.4	7.55	4.9	1	1	0	1	1	0	0	1	0	0	9	21	0
0	1	56	0	0	0	1	24	8	0	0	1	1	1	0	0								1	0	0	1	0	0	0	1	0	0	5	29	0
0	0	80	0	0	1	1	24	5	1	0	1	1	0	0	0	11	113	206	16.5	53	2.84	2.92	1	1	0	1	1	0	0	1	0	0	13	48	0
0	1	59	0	1	1	1	31	3	1	0	0	0	0	0	0	5.4	23	220	15.7	39.8	1.67	3.4	1	1	1	1	0	0	1	1	0	1	20	20	0
0	0	82	0	1	0	1	15	15	1	0	0	1	0	0	0	12.9	271	142	13	38.5	7.4	1.15	1	0	0	0	0	0	0	1	0	1	17	32	0
0	1	53	0	1	0	1	21	15	1	0	1	1	0	1	1								1	0	0	1	0	0	0	1	0	0	1	5	0
0	1	40	0	0	0	1	25	14	1	0	1	0	0	0	0	14.4	307	156	15.3	40.7	6.97	2.08	1	1	0	1	0	0	0	1	0	0	27	35	0
0	0	69	0	1	0	1	26	15	0	0	1	1	0	0	0								1	1	0	1	0	0	0	1	0	0	5	14	0
0	0	51	0	1	0	1	8	15	0	0	1	0	0	0	0	13.6	104	134	15.4	65.4	12.05	4.1	1	1	0	1	0	0	0	1	1	1	8	9	1
0	0	51	0	0	0	1	14	15	0	0	0	0	0	0	0								1	0	1	1	1	0	0	1	0	0	2	30	0
0	0	67	0	1	0	1	19	14	0	0	0	0	0	0	0	8.5	348	119	14.9	37.3	5.84	5.58	1	0	1	1	0	0	0	0	0	0	24	50	0
0	0	68	0	1	0	1	18	6	0	1	0	1	0	0	0	12.6	173	109	14.6	34.5	6.42	1.96	1	0	0	1	0	0	0	0	0	1	13	13	0
0	0	50	0	1	0	1	8	15	0	0	1	0	0	0	0	35.8	409	128	15.7	35.1	7.45	7.19	1	0	0	1	0	0	0	1	0	0	12	12	0
0	0	33	0	0	0	0	8	14	0	0	1	0	0	0	0	7.6	330	114	14.2	35.2	6.18	4.15	1	0	0	0	0	0	0	1	0	1	17	21	0
0	0	59	0	1	0	1	15	15	0	0	0	0	0	0	0								1	1	0	1	0	0	0	1	0	0	6	6	0
0	0	40	0	1	0	1	6	15	0	0	0	0	0	0	0								1				0	0	0	1	0		1	1	0
0	0	39	0	1	0	1	24	7	0	0	0	0	0	0	0	7.9	103	152	13.8	31.1	2.63	5.9	1	0	1	0	1	0	0	1	0	0	6	14	0
0	1	39	0	1	0	1	12	15	0	0	0	1	0	0	0	6.4	149	155	13.8	34	3.83	1.11	1	1	0	1	1	0	0	1	0	0	4	22	0
0	1	63	0	1	0	1	18	8	0	1	0	1	0	1	1								1	1	1	0	0	0	0	1	0	0	2	10	0
0	1	62	0	1	0	1	25	3	0	0	0	0	0	0	0	9.6	265	140	13.7	39.9	9.95	1.83	1	0	0	0	0	0	0	0	0	1	9	10	0
0	1	65	0	0	0	1	17		0	0	0	1	0	0	0	6.7	147	174	14.5	39.9	9.74	1.41	1	0	0	0	0	0	0	1	0	0	11	26	0
0	1	49	0	1	0	1	15	14	0	0	1	0	0	0	1	12.6	295	145	14.5	35	5.39	2.75	1	0	1	0	0	0	0	1	0	0	17	53	0
0	1	58	0	1	0	1	9	15	0	0	1	0	0	0	1	6.2	139	146	15.8	39.4	3.83	0.66	1	0	1	0	0	0	0	1	0	1	12	29	0
0	1	46	0	1	0	1	20	7	0	0	1	0	0	0	0	10.5	274	76	14.2	34.5	5.69	6.29	1	0	1	0	1	0	0	1	0	0	12	22	0
0	1	44	0	0	0	1	14	15	0	0	1	1	0	1	1								1	0	0	0	0	0	0	1	0	0	2	19	0
0	1	14	0	0	0	1	5	15	0	0	1	0	0	0	0	9.9	128	134	15.4	35.8	7.36	6.45	1	1	0	0	0	1	0	1	0	0	36	114	0
0	1	40	0	1	0	1	16	15	0	0	1	0	0	0	0	14.6	173	107	15	36.4	5.27	1.63	1	0	1	0	0	1	0	1	0	1	21	35	0
0	1	33	0	0	0	1	17	5	0	0	1	1	0	0	0	0							1	0	1	0	0	0	0	1	0	0	7	23	0
0	1	50		1	0	1	13	15	1	0	0	1	0	0	0	10.7	288	141	15.4	37	7.51	2.41	1	1	1	0	0	1	0	1	0	0	7	20	0
0	0	65	0	0	1	1	13	12	0	0	1	0	0	0	0	11.3	235	172	15.9	38.2	10.81	1.62	1	0	1	0	0	0	0	1	0	0	7	24	0
0	0	13	0	0	0	1	8	15	0	0	0	0	0	0	0	13.7	302	124	15.5	40.6	7.8	4.51	1	0	0	0	0	0	0	1	0	1	16	16	0
0	0	69	0	1	0	1	20	11	0	0	1	1	0	0	0	16.5	232	193	14.8	4.56	4.56	10.81	1	1	0	0	0	1	0	0	0	1	11	11	0
0	1	54		0	0	1	10	12	1	0	1	0	0	0	0	7.9	184	130	14.2	34.7	6.08	1.76	1	0	0	0	0	0	0	1	0	1	11	13	0
0	1	70	0	0	1	1	7	15	0	0	1	0	0	0	0	11.2	272	153	13.2	36.7	5.87	2.53	1	1	0	0	0	0	0	1	0	0	19	35	0
0	0	23	0	1	0	1	17	8	0	0	0	1	0	0	0	6.3	160	174	14.8	45.6	9.33	1.48	1	1	0	1	0	0	0	1	0	0	11	11	1
0	0	38	0	1	0	1	8	9	0	0	1	0	0	0	0	10.5	191	140	16.4	41.6	7.19	6.26	1	1	0	1	0	0	0	1	0	0	17	41	0
0	1	57	0	1	0	1	21	6	0	0	1	0	0	1	0	17.6	146	88	16.4	36.5	3.92	4.94	1	1	0	1	0	0	0	1	0	0	14	65	0
0	1	34	0	1	0	1	16	15	0	0	0	0	0	0	0	11	331	128	13.1	31.3	5.17		1	1	0	0	0	0	0	1	0	0	19	62	0
0	1	38	0	1	0	1	19	3	1	0	1	0	0	0	0	7.9	184	76	14.6	36.9	3.54	2.6	1	0	0	1	0	0	0	1	0	0	12	51	0
0	1	33	0	1	0	1	16	3	1	0	1	0	0	0	0	11.1	135	136	16.2	39.8	3.67	8.22	1	1	0	0	0	0	0	1	0	0	26	69	0
0	0	51	0	1	0	1	10	12	0	0	0	0	0	0	0	13.1	137	142	15.5	43.3	1.44	0.88	1	1	1	0	1	0	0	1	0	0	9	20	0
0	0	61	0	1	0	1	20	6	0	0	1	0	0	0	0								1	1	0	0	0	0	0	1	0	0	2	12	0
0	1	38	0	1	0	1	16	6	0	0	1	0	0	1	1	7.4	154	206	14.4	43.6	4.66	1.29	1	1	0	0	0	1	0	1	0	0	2	25	0
0	1	70	0	0	0	1	19	6	0	0	0	1	0	1	1	5.8	122	146	13.6	31.8	4.14	6.36	1	0	1	0	0	0	0	1	0	0	14	64	0
0	1	50	0	0	0	1	11	13	0	0	0	0	0	1	1								1	0	0	0	0	0	0	1	0	0	2	11	0
0	0	61	0	1	0	1	14	7	0	0	1	1	0	0	0								1	1	0	0	0	0	0	1	0	1	1	1	0
0	1	49	0	1	0	1	15	15	0	0	1	0	0	0	0	14.4	69	205	15.7	48.4	5.88	60	1	0	0	0	0	0	0	0	0	0	5	5	0
0	1	45	0	0	0	1	16	13	0	0	0	0	0	0	1	12.8	270	150	15.8	46.9	8.55	2.08	1	1	0	0	0	0	0	1	0	0	6	16	0
0	1	46	0	1	0	1	18	3	1	0	0	0	0	0	0								1	0	1	0	1	1	0	0	0	0	1	18	0
0	1	37	0	1	0	1	10	15	0	0	1	0	0	0	0								1	0	0	0	0	0	0	0	0	0	4	12	0
0	1	35	0	0	0	1	11	14	1	0	1	0	0	0	0	12.3	95	125	14.4	46.7	6.56	16.44	1	1	0	1	0	0	0	1	0	1	12	12	0
0	1	41	0	1	0	1	20	5	1	0	1	0	0	0	0	5.5	223	87	16.1	44.3	4.47	4.38	1	0	0	0	0	0	0	0	0	0			0
0	1	48	0	1	0	1	25	5	1	0	1	0	0	0	0	14.6	279	90	15.3	35.5	6.53	11.36	1	0	0	1	0	1	0	0	0	1	12	24	0
0	0	40	0	0	1	1	20	8	0	0	1	0	0	0	0								1	0	0	0	0	0	0	1	0	0	1	31	0
0	1	9	0	0	1	1	16	15	0	0	1	0	0	0	0	8.2	305	91	14.3	42.3	5.45	5.26	1	0	0	0	1	0	0	1	0	0	9	20	0
0	1	53	0	0	1	1	17	14	0	0	1	1	0	1	0	7.1	173	102	13.9	36.2	5.96	9.62	1		1	0	0	0	0			0	7	28	1
0	0	26	0	1	0	1	13	3	0	0	0	0	0	0	0	15.8	214	102	15.4	28.1	5.78	4.94	1	0	1	1	0	0	0	0	0	1	16	38	0
0	0	52	0	1	0	1	13	15	0	0	1	0	0	0	0								1	0	0	0	0	0	0	1	0	0	2	18	0
0	0	54	0	1	0	1	7	15	0	0	1	1	0	0	0	20.7	386	158	14.7	39.7	6.14	3.09	1	1	0	1	1	0	0	1	0	0	23	38	0
0	0	50	0	1	0	1	12	14	0	0	1	0	0	0	1	7.1	168	113	13.4	36	6.15	4.93	1	0	0	1	0	1	0	1	0	0	13	40	0
0	0	59	0	1	0	1	9	9	0	0	0	0	0	0	1	9.3	126	136	14.4	31.7	4.23		1	0	0	0	0	0	0	0	0	0	14	35	0
0	0	39	0	1	0	1	8	15	0	0	1	0	0	0	0	16.6	234	103	12.9	38.3	7.57	2.4	1	1	1	0	0	1	1	1	0	1	14	44	0
0	0	46	0	1	0	1	23	9	0	0	1	0	0	0	1	5.4	98	99	17.2	47.8	3.98	2.64	1	1	0	0	0	0	0	0	0	0		27	0
0	1	54	0	1	0	1	20	5	0	0	0	0	0	1	0	8	234	123	14.8	34.3	6.37	2.78	1	1	0	0	0	0	0	1	0	0	7	27	0
0	1	71	0	0	0	1	13		0	0	1	1	0	1	0	14.5	86	172	14.8	38	4.33	8.26	1	0	0	0	0	1	0	1	0	0	13	39	0
0	1	43	0	1	0	1	17	13	0	0	0	0	0	0	0								1	0	0	0	0	0	0	1	0	0	1	16	0
0	1	39	0	1	0	1	9	8	0	0	0	1	0	1	1	17.6	164	138	14.4	28.5	2.8	7.58	1	0	1	0	0	0	0	1	0	0	5	24	0
0	1	38	0	0	0	0	8	15	0	0	0	0	0	1	1	8.2	191	131	13.7	34.6	7.06	5.72	1	0	0	0	0	0	0	0	1	0	13	31	0
0	1	0	0	1	0	1	8	15	0	0	0	0	0	0	0	11.7	350	136	15.4	45.9	5.29	7.13	1	0	0	0	0	0	0	0	0	0			0
0	1	43	0	1	0	1	29	15	0	0	0	0	0	1	0	22.6	24	123	24.1	50.8	4.44	9.42	1	0	1	0	0	0	0	0	0	1			0
0	1	38	0	0	0	1	10	14	0	0	1	0	0	1	1	11.3	113	123	14.6	33.1	1.83	16.06	1	0	1	0	0	0	0	0	0	0			0
0	1	38	0	0	0	1	10	14	0	0	1	0	0	1	1								1	0	1	0	0	0	0	0	0	0	1		0
0	1	10	0	0	0	1	18	14	0	0	1	0	0	0	0	10.4	331	160	17.1	59.7	6	2.95	1	1	0	1	0	1	0	1	0	0	14	14	1
0	1	38	0	0	0	1	28	5	0	0	1	1	0	1	1	16	241	160	13.5	36.1	2.36	0.38	1	1		0	0	0	0	1	0	0			0
0	1	38	0	0	0	1	13	11	0	0	1	1	0	1	1	4.9	105	224	14.8	39.9	5.12	0.96	1	1	0	0	0	0	0	1	0	0		26	0
0	1	63	0	1	0	1	25	3	0	0	1	1	0	0	1								1	0	0	0	0	0	0	0	0	0	2	11	0
0	1	40	0	1	0	1	22	8	1	0	1	0	0	0	0	7.3	279	105	14.6	41.4	6.51	9.84	1	1	0	0	0	0	0	1	0	0	15	20	0
0	0	68	0	1	0	1	17	15	0	0	1	1	0	0	0	13.4	105	129	15.1	37.6	4.74	58.88	1	0	0	1	0	0	0	0	0	0	12	12	1
0	1	40	0	1	0	1	20	11	0	0	1	0	0	0	1	11.1	163	165	14.1	37	4.33	1.34	1	1	0	0	0	0	0	1	0	0			0
0	0	77	0	1	0	1	29	4	1	0	0	0	0	0	0	7.9	147	105	12.9	32.9	3.24	12.33	1	0	0	0	0	0	0	1	0	0	20	44	0
0	0	9	0	1	0	1	8	14	1	0	1	0	0	0	0	8.3	163	154	13.2	36.6	6.3	3.39	1	1	0	0	0	0	0	1	0	0	21	54	0
0	1	56	0	0	1	1	16	7	0	0	1	1	0	0	0	11.5	140	89	11.7	47.4	7.43	2.72	1	1	0	0	0	0	0	0	0	0	8	8	0
0	0	55	0	1	0	1	7	15	0	0	1	0	0	0	0	11.4	185	135	11.9	30.2	6.31	2.61	1	0	0	1	0	0	0	1	0	0	15	91	0
0	0	53	0	0	0	1	19	7	0	0	1	0	0	0	0	8.6	46	231	13.8	50.2	3.86	2.33	1	1	1	1	0	1	0	1	0	0	18	35	0
0	0	50	0	0	0	1	19	3	0	0	1	1	0	1	1								1	1	0	0	0	0	0	0	0	0	1	1	0
0	0	53	0	1	0	1	13	4	0	0	0	1	0	0	0	9.3	289	95	10.7	27.8	4.49	5.85	1	0	0	1	0	0	0	0	0	0	14	21	0
0	0	50	0	1	0	1	14	15	0	0	0			0	0								1	1	0	0	0	0	0	0	0	0	5	19	0
0	0	71	0	1	0	1	13	7	0	0	0	1	0	0	0	5.9	201	135	12	33.8	5.07	4.82	1	0	1	1	0	0	0	0	0	0	9	16	0
0	0	48	0	0	0	1	19	9	0	0	1	1	0	0	0	8.5	155	152	12.2	41.3	4.59	3.26	1	0	0	0	0	0	0	0	0	0	9	15	0
0	0	41	0	0	0	1	6	14	0	0	1	0	0	0	0	6	321	105	13	43.6	5.18	0.98	1	0	0	0	0	0	0	0	0	0	30	101	0
0	0	51	0	1	0	1	16	14	0	0	1	1	0	0	0	8.7	129	208	13.5	44.4	4.11	2.4	1	0	1	0	0	0	0	1	0	1	18	31	0
0	0	56	0	0	0	1	20	5	0	0	1	0	0	0	0	10.5	154	183	16.7	38.6	6.4	3.03	1	1	0	0	0	0	0	1	0	0	12	27	0
0	0	66	0	1	0	1	11	10	0	0	1	1	0	0	0								1	1	0	0	0	0	0	1	0	0	7	7	0
0	0	66	0	1	0		14	11	0	1	1	1	0	0	0								1	0	1	0	0	0	0	0	0	0	2	17	0
0	1	68	0	0	0	1	26	14	0	0	1	1	0	1	0	21.6	311	107	12.1	37.3	4.94	4.56	1	0	0	1	0	0	0	1	0	0	11	12	0
0	1	55	0	1	0	1	25	5	0	0	1	1	0	0	0	6.3	261	76	11.8	40.2	6.36	3.47	1	0	0	1	1	0	0	0	0	0	12	22	0
0	1	75	0	1	0	1	10	14	0	0	1	1	0	0	0	13.5	30	223	15.1	49.1	4.27	47.95	1	0	1	1	0	1	0	0	0	0	8	8	0
0	1	50	0	0	0	1	14	6	0	0	1	0	0	1	1	13.7	125	139	12.6	34.7	4.3	2.09	1	1	1	1	0	0	0	1	0	0	11	28	0
0	1	69	0	1	0	1	27	3	0	0	1	0	0	0	1	25.8	98	68	17.1	53.2	1.52	1.05	1	0	0	1	1	0	0	1	0	0	27	41	0
0	1	36	0	1	0	1	15	14	0	0	1	1	0	1	0	7.4	185	84	12.4	37.6	4.39	5.44	1	0	0	1	1	0	0	0	0	0	20	27	0
0	1	56	0	1	0	0	17	8	0	0	1	1	0	1	1								1	0	1	0	1	0	0	1	0	0	5	23	0
0	1	62	0	1	0	1	10	7	0	0	1	0		0	1	8.6	172	117	14.1	43.3	6.41	1.79	1	1	0	0	0	0	0	1	0	1	20	31	0
0	1	60	0	0	0	1	14	5	0	0	1	1	0	1	0	7.8	168	178	14.9	49	4.24	2.79	1	1	0	0	0	0	0	1	0	0	13	74	0
0	1	47	0	0	0	1	15	15	0	0	0	0	0	1	1								1	1	0	1	0	0	0	0	0	0	4	4	1
0	1	50	0	0	0	1	20	3	0	0		0	0	1	1	11.2	332	188	13.8	43.7	4.69	3.45	1	1	0	0	0	0	0	1	0	0	11	26	0
0	1	49	0	1	0	1	17	13	0	1	1	0	0	0	0	7.4	183	100	12.6	34.5	4.04	3.55	1	1	0	0	0	0	0	1	0	0	10	17	0
0	1	52	0	0	0	1	14	14	0	0	1	1	0	1	1	10	202	153	13.5	40.2	3.72	30.48	1	1	0	0	0	0	0	1	0	0	7	26	0
0	0	59	0	0	0	1	18	3	0	0	1	0	0	0	0	6.7	117	214	14.2	40.1	4.18	24.3	1	0	0	1	0	1	0	0	0	0	16	25	0
0	1	54	0	0	1	1	30	4	1	0	0	1	0	0	0								1	0	0	0	0	0	0	1	0	0	3	19	0
0	0		0	1	0	1	15	15	0	0	1	0	0	0	0	8.8	80	205	12.6	37.8	4.33	7.97	1	0	0	0	0	0	0	1	0	0	4	4	0
0	0	47	0	0	0	1	15	8	0	0	1	1	0	0	0	8.1	199	165	13.3	49.8	4.55	9.43	1	1	0	0	0	1	0	1	0	0	10	27	0
0	1	36	0	0	0	1	11	15	0	0	1	0	0	0	0	7	218	109	14.7	37.9	6.64	7.63	1	1	0	1	0	0	0	1	0	0	19	81	0
0	0	34	0	1	0	1	10	10	1	0	1	0	0	0	0	7.2	77	122	14	35.8	5.62	4.4	1	1	1	1	0	0	0	0	0	0	14	44	0
0	1	46	0	0	1	1	12	15	0	0	1	0	0	1	1								1	1	0	1	0	0	0	0	0	1	4	14	0
0	1	59	0	0	1	1	15	11	0	0	1	1	0	0	0	12.7	217	168	13.8	37.4	6.34	4.05	1	1	0	1	0	0	0	1	0	0	18	51	0
0	0	51	0	1	0	1	19	4	0	0	0	1	0	0	0								1	1	0	1	0	0	0	0	0	0	1	9	1
0	0	58	0	0	0	1	17	3	0	0	1	1	0	0	0	19.3	187	83	11	33.5	4.68	10.12	1	1	0	1	0	0	0	1	1	0	10	10	1
0	1	68	0	1	0	1	17	15	0	0	0	0	0	0	0	11.2	231	123	12.5	41.5	4.1	12.73	1	1	0	1	0	0	0	0	0	0	17	109	0
0	1	28	0	0	0	1	12	10	0	0	0	0	0	0	0	11.3	308	132	12.8	44.6	6.78	3.92	1	0	0	1	0	0	0	0	1	0	16	41	0
0	1	64	0	0	0	1	17	7	0	0	1	1	1	0	0	7.9	231	115	11.5	42	4.13	2.69	1	1	0	1	0	1	0	1	0	0	25	50	0
0	1	65	0	1	0	1	22	15	0	0	1	0	0	0	0	9	74	185	13.7	38	6.7	10.04	1	0	1	1	0	0	0	1	0	0	13	31	0
0	1	34	0	0	0	1	6	13	0	0	0	0	0	1	0	7.8	190	129	13.5	32.6	6.09	9.02	1	1	0	1	0	0	0	0	0	0	12	45	0
0	1	66	0	1	0	1	20	12	0	0	1	0	0	0	1	13	137	246	18.8	47.2	5.02	14.17	1	1	0	1	0	0	0	1	0	0	11	18	0
0	0	30	0	0	0	1	25	5	1	0	1	0	0	1	1	6.7	173	113	13.3	40.8	8.74	7.54	1	0	0	0	0	0	0	0	0	0	22	42	0
0	1	35	0	1	0	1	18	15	1	0	1	1	0	0	0	9.5	269	130	12.6	40.9	4.78	3.04	1	1	0	1	0	0	0	0	0	0	20	23	0
0	1	50	0	0	0	1	7	15	0	0	1	1	0	0	1	16.5	221	108	14	45.4	6.38	4.21	1	1	1	1	0	0	0	1	0	0	24	24	0
0	1	58	0	1	0	1	7	15	0	0	1	1	0	0	0	8.6	178	195	14	42.1	5.3	1.17	1	1	1	0	0	0	0	1	0	1	6	13	0
0	1	65	0	1	0	1	21	10	0	0	0	1	0	0	1	7.8	194	119	11.6	36.7	6.81	1.18	1	1	0	0	0	0	0	1	0	0	47	118	0
0	0	43	0	1			22	15	0	0	0	1	0	0	0								0	0	0	0	0	0	0	0	0	0	5	38	0
0	0	53	0	0	0	1	12	7	1	0	0	0	0	0	0								1	1	0	0	1	0	0	1	0	0	2	22	0
0	1	49	0	0	0	0	16	3	1	0	0	0	0	0	1	6.7	225	126	13	33.3	5.47	2.88	1	1	0	0	0	0	0	1	0	0	14	24	0
0	1	33	0	0	0	0	16	6	1	0	0	0	0	0	0								1	1	0	0	0	0	0	1	0	0	8	27	0
0	0	59	0	0	0	0	14	3	1	0	1	0	0	0	0	11.6	205	132	14	37.4	5.04	1.29	1	1	0	1	0	0	0	1	0	0	6	14	0
0	1	45	0	1	0	0	15	4	1	0	1	1	0	0	0	7.2	145	111	15.4	36.6	5.67	5.79	1	1	0	1	0	0	0		0	0		15	0
0	1	49	0	0	0	0	13	4	1	0	1	0	0	1	1	5.9	169	113	13.2	36.4	3.64	11.6	1	1	0	1	0	0	0	1	0	0	11	23	0
0	0	48	0	1	0	1	15	9	0	0	1	0	0	0	0	13.8	189	154	14.1	39.3	6.07	3.16	1	0	0	1	0	0	0	0	0	0	8	8	0
0	0	50	0	0	0	0	16	6	0	0	0	0	0	1	1	9.5	228	138	13.7	35.6	6.18	7.74	1	1	0	0	0	0	0		0	0	7	18	0
0	0	58	0	0	0	0	18	14	0	0	1	0	0	0	0	12.8	164	157	13.7	31.6	5.07	5.57	1	0	0	0	0	0	0	1	0	0	10	31	0
0	0	54	0	0	0	0	16	15	0	0	0	0	0	1	0	15	273	130	13.4	39.1	6.95	8.32	1	1	1	1	0	0	0	1	0	0	8	24	0
0	0	57	0	0	0	0	13	12	0	0	1	0	0	0	0	6.6	67	100	17.3	51.2	6.22	9.15	1	1	1	1	0	0	1	1	0	0	9	9	0
0	0	69	0	1	0	1	18	8	0	0	1	1	0	0	0								1	1	1	1	0	1	0	1	0	0	6	7	0
0	1	38	0	0	0	1	25	7	0	0	0	0	0	0	0	11.8	197	165	11.9	47.3	5.62	2.9	1	1	0	0	0	0	0	0	0	0	22	49	0
0	1	58	0	0	0	0	15	14	0	0	1	1	0	0	0	7	218	109	14.7	37.9	6.64	7.63	1	0	1	0	0	0	0	1	0	0	30	81	0
0	1	53	0	0	0	0	9	14	0	0	1	0	0	1	0	10.2	176	154	15.1	38.8	6.32	3.27	1	1	0	1	0	0	0	1	0	0	15	63	0
0	1	52	0	0	0	0	14	3	0	0	1	1	0	0	1	12.5	89	115	14.8	51.5	5.56	4.36	1	1	0	1	0	0	0	1	0	0	5	35	0
0	1	47	0	0	0	0	16	12	0	0	0	1	0	1	1	9.2	131	183	13.4	43.4	5.45	1.68	1	1	0	1	0	0	0	1	0	0	22	39	0
0	1	49	0	0	0	0	8	15	0	0	0	0	0	1	1	17.7	87	88	14.7	48.4	4.35	1.57	1	0	0	1	0	0	0	0	0	0	11	11	1
0	1	45	0	0	0	0	13	3	0	0	0	1	0	1	1	5.3	172	83	14.5	38	6.93	2.72	1	1	0	1	1	0	0	1	0	0	9	20	0
0	1	5	0	0	0	0	9	14	0	0	0	0	0	1	1	7.6	222	119	14.4	44	4.84	5.74	1	1	0	1	0	0	0	1	0	0	10	16	0
0	1	51	0	0	0	0	12	9	0	0	0	1	0	1	1								1	1	0	0	0	0	0	1	0	0	5	5	1
0	1	58	0	1	0	1	20	3	0	0	1	1	0	0	0								1	1	0	1	0	0	0	1	0	0	1	2	0
0	0	65	0	1	0	1	11	14	0	0	1	1	0	0	0	11.3	235	153	13.7	41.4	5.58	5.26	1	0	0	1	0	0	0	1	0	0	10	18	0
0	0	63	0	1	0	1	16	15	0	0	0	0	0	0	0								1	1	0	1	0	0	0	1	0	0	6	7	0
0	1	39	0	0	0	0	14	6	0	0	1	1	0	0	0	8	203	120	11.3	32.6	5.33	4.17	1	0	0	1	0	0	0	0	0	0	7	112	0
0	1	38	0	0	0	0	16	3	0	0	0	0	0	1	1	9.9	177	124	14	33.6	5.42	10.45	1	0	0	0	0	0	0	0	0	1	19	31	0
0	1	36	0	0	0	0	15	8	0	0	0	1	0	1	1								1	0	1	0	1	0	0	0	0	0	1	20	0
0	1	41	0	1	0	0	22	7	1	0	1	0	0	0	0	12.4	319	85	12.5	39.2	4.75	14.1	1	1	0	1	1	0	0	1	0	0	8	8	0
0	1	52	0	0	0	0	8	15	0	0	1	1	0	1	1	10.9	145	145	11.8	29.2	4.18	11.57	1	0	0	1	0	0	0	0	0	1	8	28	0
0	1	29	0	1	0	0	8	14	0	0	1	0	0	0	0	7.5	153	113	14.3	50.4	5.2		1	0	0	1	0	0	0	0	0	0	8	8	0
0	1	50	0	0	0	0	14	3	0	0	1	1	0	1	1	28	281	107	12	31.6	3.14	4.56	1	0	1	1	0	0	0	1	0	0	12	12	0
0	1	59	0	0	0	0	19	11	0	0	1	0	0	0	0	14.3	315	97	13.3	35.6	3.93	7.91	1	0	1	1	1	1	0	0	0	1	11	14	0
0	1	47	0	0	0	1	18	5	0	1	1	0	0	1	1								1	0	1	0	0	0	0	0	0	0	1	20	0
0	1	58	0	0	0	0		9	0	0	1	0	0	0	1	8.9	200	109	14.1	36.2	6.01	8.26	1	1	0	1	0	0	0	1	0	0		24	0
0	1	59	0			0	10	9	0	0	1	0	0	1	0	16.5	194	174	12.8	39.4	4.62	7.82	1	0	1	1	0	0	0	0	0	0	13	26	0
0	1	67	0	0	0	0	20	3	0	0	1	0	0	0	0	8.8	265	126	12.2	45.2	7.2	1.5	1	0	1	1	0	0	0	1	0	1	16	39	0
0	1	35	0	0	0	0	19	3	0	1	1	0	0	1	1	8	53	162	13.2	37.3	4.91	15.24	1	1	0	1	0	0	0	0	0	0	12	17	0
0	1	53	0	0	0	0	16	15	0	0	1	1	0	1	1								1	0	0	1	0	1	0	0	0	0	2	2	0
0	1	60	0	0	0	0	17	3	0	0	1	1	0	1	1	12.3	351	158	14.8	42.7	4.04	5.38	1	0	0	0	0	0	0	1	0	0	15	30	0
0	1	28	0	0	0	0	18	4	1	0	0	0	0	1	1	11.7	79	190	14.8	38.9	6.02	8.18	1	1	0	0	0	0	0	1	0	0	5	5	0
0	1	9	0	0	0	0	16	8	0	0	0	1	0	1	1	12.3	219	149	13.4	40.2	5.68		1		0	0	0	0	0		0	0	5	20	0
0	1	47	0	0	0	0	23	5	0	0	0	0	0	0	1	9.6	66	115	18.3	40.6	5.73	18.83	1	1	1	1	0	0	0	1	0	0	10	71	0
0	1	48	0	0	0	0	8	15	0	0	1	1	0	0	0	16.5	259	104	14.3	35.4	5.41	2.58	1	0	0	1	0	0	0	1	0	1	11	20	0
0	0	56	0	1	0	0	15	7	0	0	1	1	0	0	1	22.4	234	80	13.7	42.4	6.28	2.4	1	0	0	1	1	1	0	0	0	0	16	42	0
0	1	50	0	0	0	0	28	4	0	0	0	1	0	0	0	12.9	264	142	12.1	37.4	6.79	1.65	1	0	1	1	0	0	0	0	0	1	10	25	0
0	1	51	0			0	20	3	0	0	1	0	0	1	1	6.8	174	151	12.2	44.8	6.11	3.39	1	0	0	1	0	0	0	0	0	0	22	55	0
0	0	57	0	0	0	0	14	11	0	0	0	0	0	0	0	12.3	268	166	13.6	34.5	6.67	7.22	1	0	0	0	0	0	0	0	0	1	9	22	0
0	1	40	0	0	0	0	12	10	1	0	1	0	0	1	0	17.3	449	106	10.3	25.5	7.31	4.32	1	0	0	1	1	0	0	1	0	0	18	49	0
0	1	37	0	0	0	0	14	10	1	0	1	0	0	0	0	11.3	175	137	17.8	53.2	5.54	5.61	1	0	0	1	0	0	0	0	0	0	6	13	0
0	1	51	0	0	0	0	16	13	1	0	0	0	0	1	1	13.6	237	151	14.1	31.7	3.93	10.82	1	0	0	1	1	0	0	0	0	0	8	31	0
0	1	38	0	0	0	0	16	3	0	0	0	0	0	1	1	8	49	148	15.5	58.3	7.88	9.82	1	0	0	1	0	0	0	0	0	0	9	9	0
0	1	50	0	1	0	0	16	14	0	0	1	1	0	0	0	11.3	590	110	12.6	36.9	6.45	3.12	1	1	1	1	0	1	0	0	0	0	16	44	0
0	1	47	0	0	0	0	16	8	0	0	0	0	0	0	0								1	0	1	0	0	0	0	0	0	0	6	19	0
0	1	39	0	0	0	0	7	15	0	0	1	0	0	1	1	12.9	158	96	12.7	39.1	7.35	60	1	0	0	1	0	1	0	0	0	0	17	33	0
0	1	35	0	0	0	0	16	6	0	0	1	1	0	1	1	12	134	159	11.5	28.7	3.11	9.14	1	0	0	1	0	1	0	0	0	0	15	84	0
0	1	49	0	0	0	0	28	14	0	0	0	0	1	0	0	8.1	213	159	14	39.5	6.83	2.34	1	0	0	1	1	0	0	0	0	0	9	17	0
0	1	58	0	0	0	0	15	3	0	0	1	1	0	0	0								1	0	1	1	0	0	0	0	0	0	2	30	0
0	0	40	0	0	0	0	18	5	0	0	0	0	0	0	0	7.2	166	131	14.3	43.7	4.38	1.22	1	1	1	1	0	0	0	1	0	0	7	8	0
